# Supplementary material
Source: PubMed Central journal article supplement (PMC4260702)
Supplement: ismej201468x4.pdf [file ismej201468x4.pdf]

# Figure S3a: *Gammaproteobacteria: Gilliamella apicola*

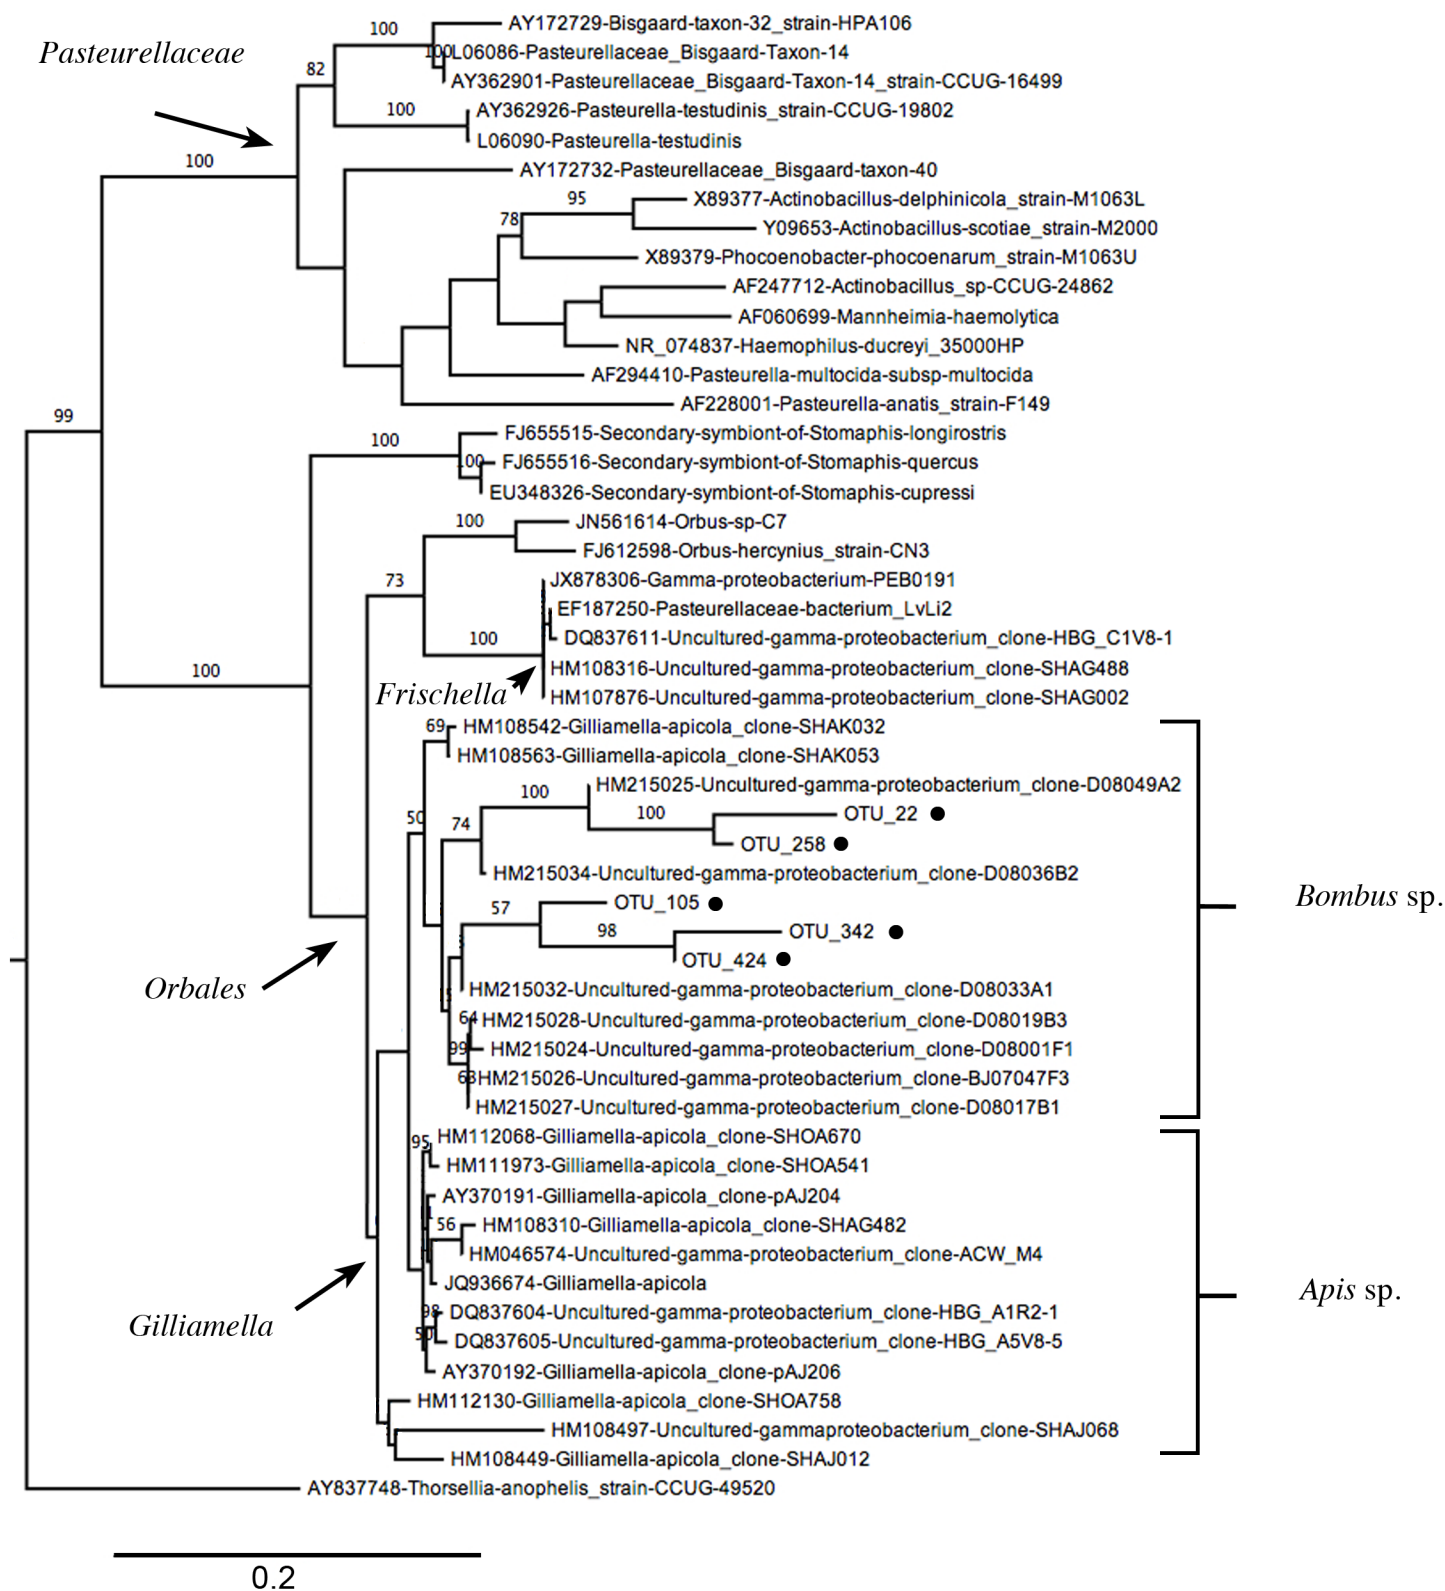

**Figure S3a:** Reads from high abundance (>1% in any sample) representative sequences of *Gilliamella* and closely related taxa reads from 454 dataset were aligned with near full length 16S rRNA sequences using RDP 2.2. Maximum likelihood trees were reconstructed by using RAxML with a GTRgamma base substitution model at 1000 iterations. Trees were visualized in FigTree 1.4. Characteristic bee related *Orbales* lineages are noted and OTU positions are marked ●.

Representative *Gammaproteobacterial* OTUs that clustered with lineages outside of Order *Orbales* not typically associated with bees are not shown. These lineages fell within several Orders including *Enterobacteriales*, *Pseudomonadales*, *Xanthomonadales*, *Legionellales*, and *Oceanospirillales*.

# Figure S3b: *Betaproteobacteria: Snodgrassella alvi*

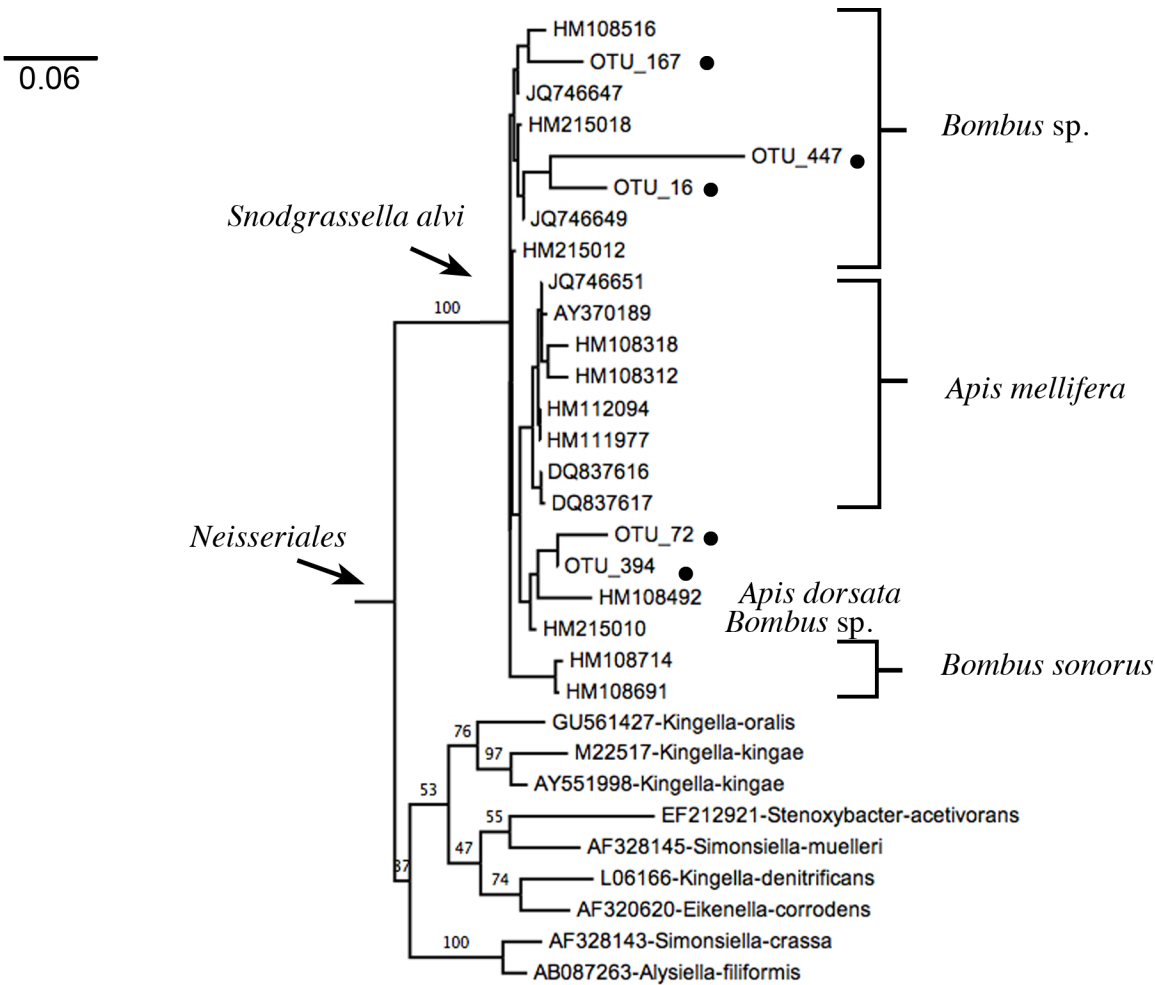

**Figure S3b:** Reads from high abundance (>1% in any sample) representative sequences of *Snodgrassella* reads from 454 dataset were aligned with near full length 16S rRNA sequences using RDP 2.2. Maximum likelihood trees were reconstructed by using RAxML with a GTRgamma base substitution model at 1000 iterations. Trees were visualized in FigTree 1.4. Characteristic bee related *Betaproteobacterial* lineage are noted and OTU positions are marked ●.

Representative *Betaproteobacterial* OTUs that clustered with lineages outside of *Snodgrassella* not typically associated with bees are not shown. These lineages fell within the Order *Burkholderiales*.





# Figure S3d: *Lactobacillus* (Firm-4, Firm-5)

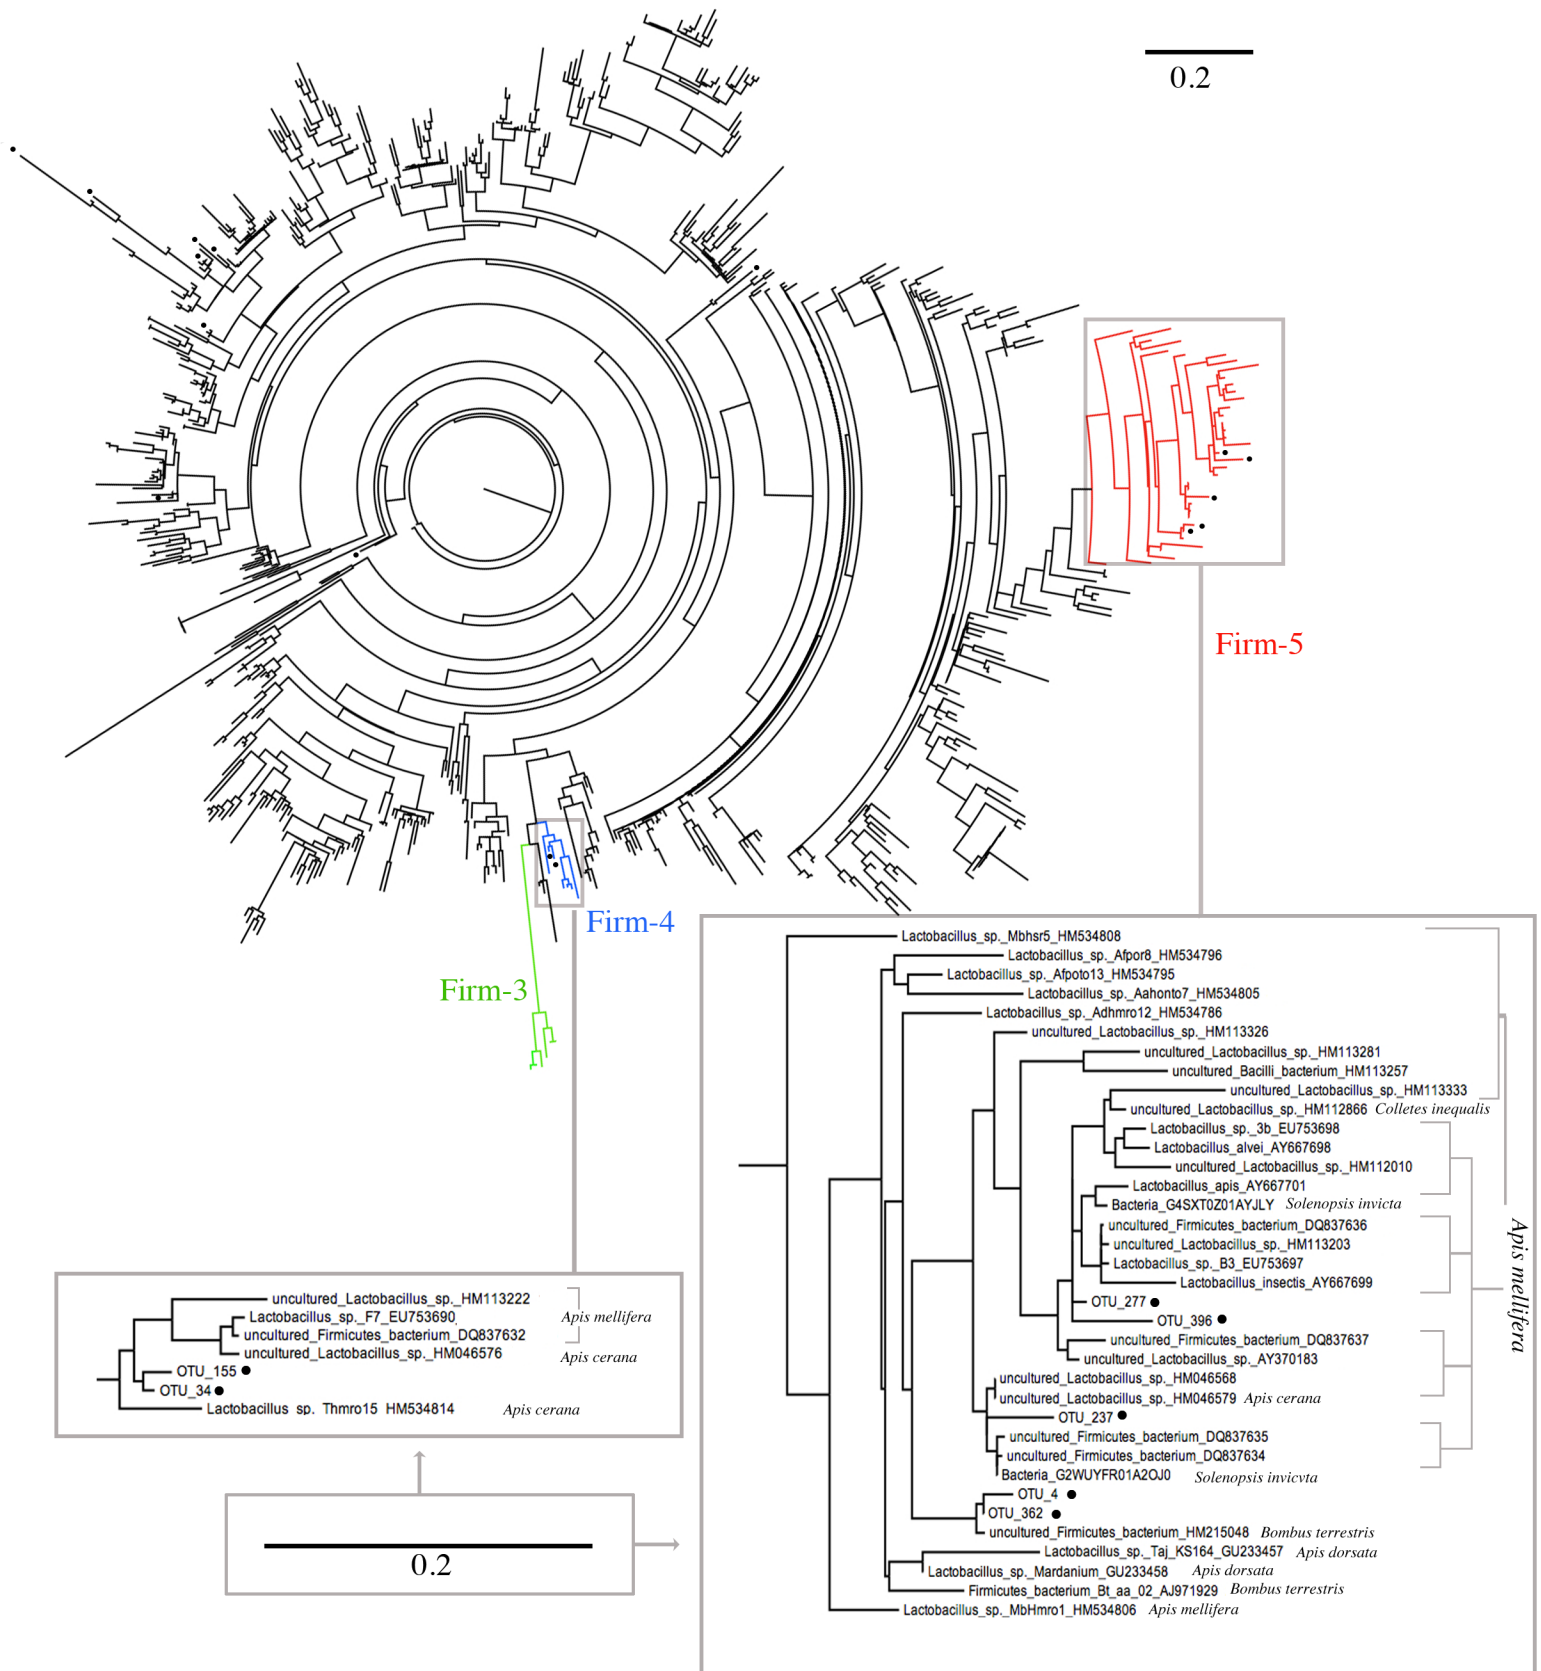

**Figure S3d:** Reads from high abundance (>1% in any sample) representative sequences of *Lactobacillus* binned reads from the 454 dataset were aligned to a previously reconstructed 16S rRNA *Lactobacillus* alignment (McFrederick et al, 2013) via the pyNAST aligner in Qiime (Caporaso et al., 2010a). Maximum likelihood trees were reconstructed by using RAXML with a GTRgamma base substitution model at 1000 iterations. Trees were visualized in FigTree 1.4. Characteristic bee related Firm-4 and Firm-5 lineages are noted and OTU positions are marked ●.
