# Supplementary material
Source: PubMed Central journal article supplement (PMC4260702)

# Supplementary Figure S1

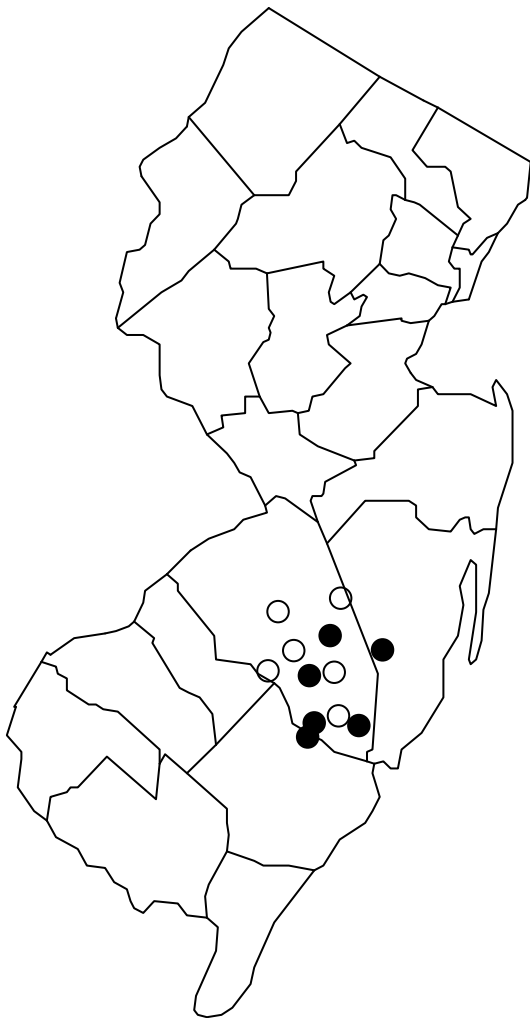

Supplement: ismej201468x2.pdf [file ismej201468x2.pdf]

Supplementary Figure S4a

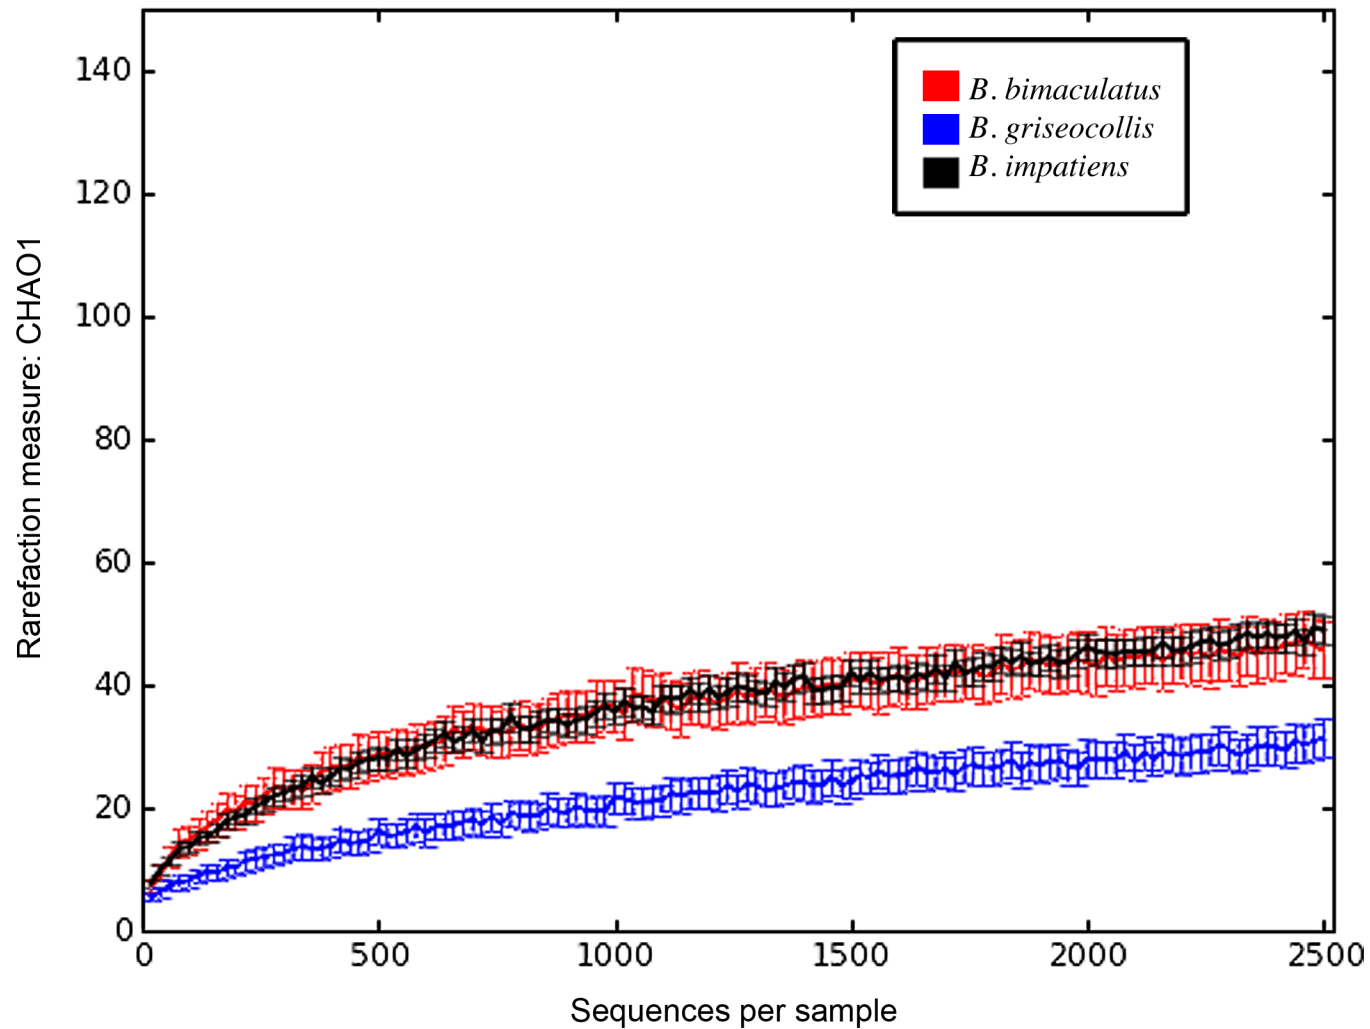

Supplementary Figure S4b

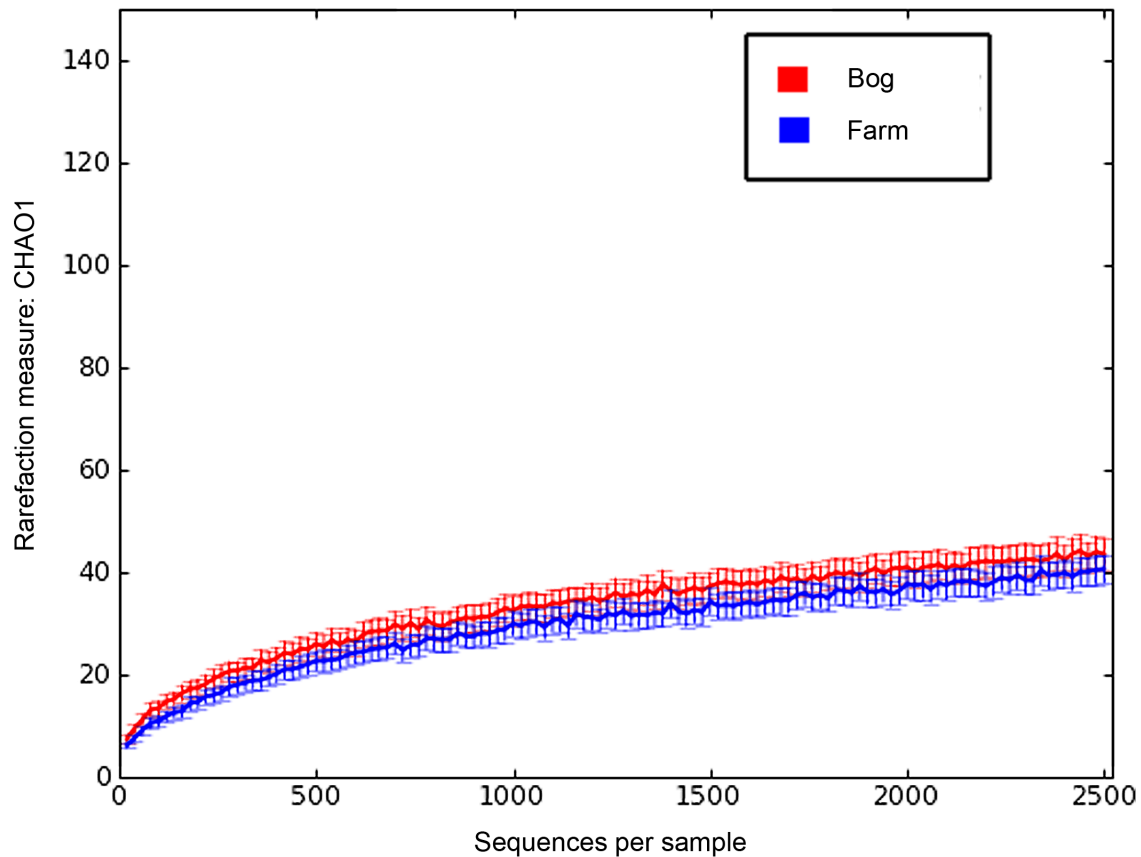

Supplement: ismej201468x5.pdf [file ismej201468x5.pdf]

# Supplemental Figure S5

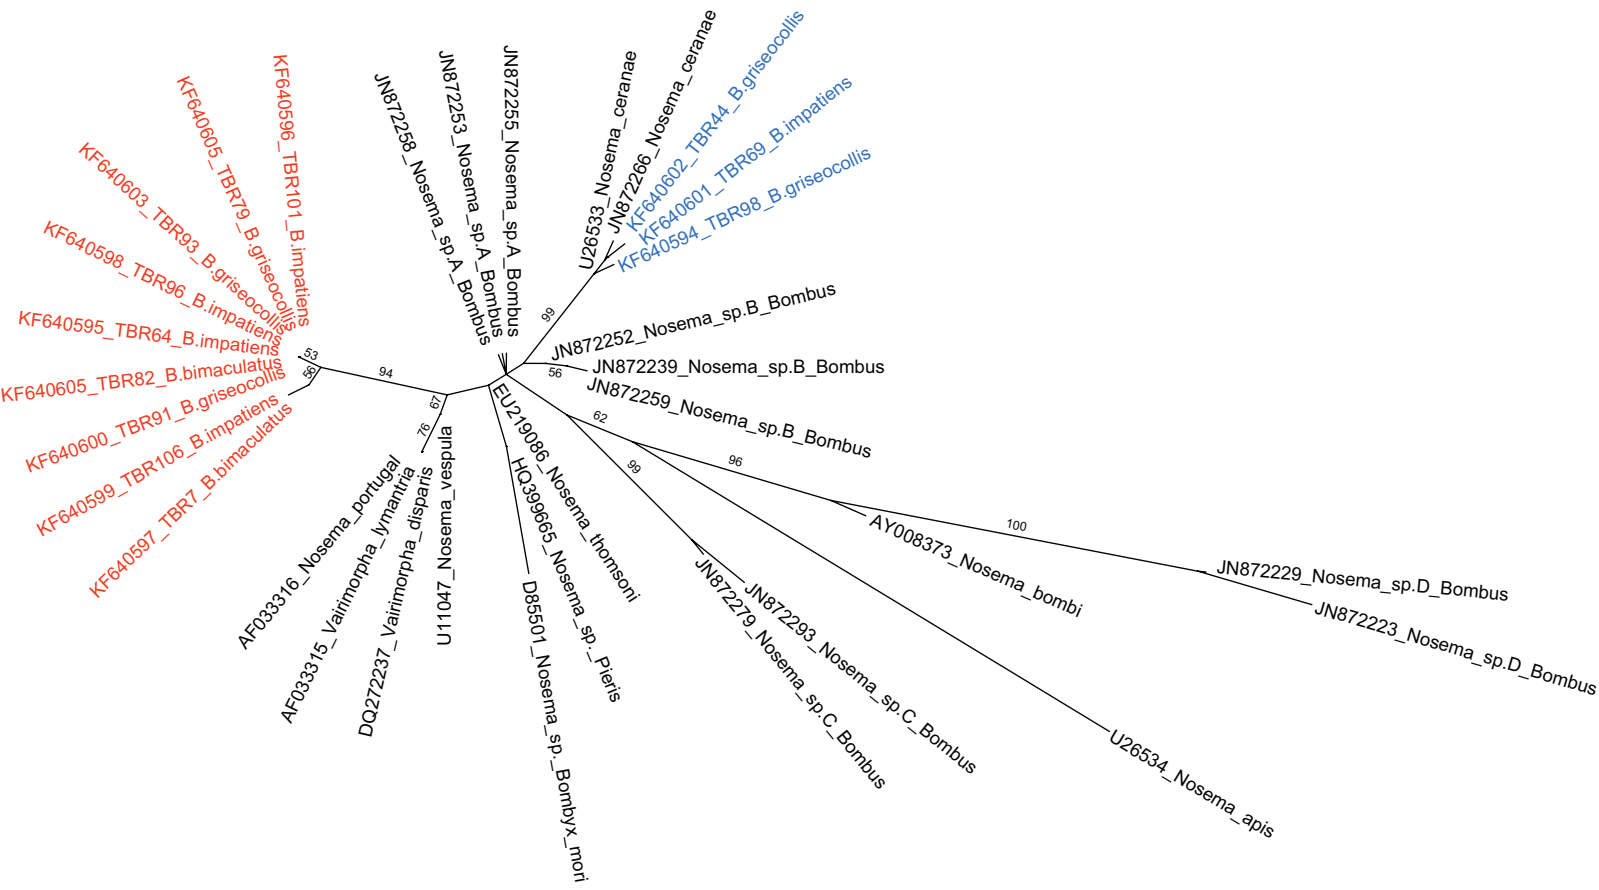

0.02

Supplement: ismej201468x6.pdf [file ismej201468x6.pdf]
